# Supplementary material for: Oxidative capacity of the Mexico City atmosphere – Part 2: A RO x radical cycling perspective
Source: Copernicus journal article supplement (doi:10.5194/acp-10-6993-2010), 2010-07-30
Supplement: Supplementary file 1 [file acp-10-6993-2010-supplement.pdf]

# Supplemental Information for Oxidative capacity of the Mexico City atmosphere - Part 2: A RO<sub>x</sub> radical cycling perspective

**P.M. Sheehy<sup>1,2</sup>, R. Volkamer<sup>1,3,4</sup>, L.T. Molina<sup>1,2</sup>, and M.J. Molina<sup>1,3</sup>**

<sup>1</sup>Massachusetts Institute of Technology, Cambridge MA

<sup>2</sup>Molina Center for Energy & the Environment, La Jolla CA

<sup>3</sup>University of California at San Diego, La Jolla CA

<sup>4</sup>University of Colorado at Boulder and CIRES, Boulder CO

Correspondence to: P. Sheehy and R. Volkamer  
(sheehy@alum.mit.edu and rainer.volkamer@colorado.edu)

# 1 Model Constraints

## 1.1 Alkanes

Alkanes were scaled using a combination of data collected via whole air canister sampling (Velasco et al., 2007) and continuous FTIR measurements (Table 1). For the days that both measurements from canister sampling and FTIR sampling are available, the data show good agreement. The concentration of each individual alkane species, relative to the sum of the alkane species (in ppbC), is effectively constant throughout the day. Diurnal profiles for each alkane species were subsequently determined by scaling continuous FTIR measurements (of effective C-H stretches) by the ratios determined from canister speciation. Based on measurement uncertainty from the GC-FID and FTIR, and the scaling methodology, we estimate uncertainty for the alkanes input as  $\pm 25\%$ .

## 1.2 Alkenes

The concentrations of alkene species (Table 1) were determined using the canister data and measurements from a Fast Isoprene Sensor (FIS). A generic FIS signal was plotted against the alkene data from the canister samples accounting for the response of the FIS towards different olefin species (Velasco et al., 2007); for species in which the response factor was not available, the response factor is assumed to be unity. The scaling factors derived from the canister data are used with the continuous FIS data to generate time-resolved input parameters for the alkenes. The scaling factors for alkenes included in the box model that were not directly measured are determined using speciation profiles, as found in the literature (Harley et al., 1992). We estimate uncertainty for the alkenes input as  $\pm 25\%$ .

## 1.3 Aromatics

The concentrations of aromatic species in the model are determined by direct DOAS measurements (Volkamer et al., 2004, 2005) following evaluation protocols developed by Volkamer et al. (1998), a scaling methodology using canister data, and emissions factors (Harley et al., 1992).

The compounds measured directly by DOAS and scaled using other measurements are listed in Table 1. The direct measurement of benzene is used in conjunction with canister data to scale aromatic compounds not measured by DOAS. The DOAS instruments also measured a general mono-substituted benzene signal, which is assumed to be a weighted response from ethyl benzene, n-propyl benzene, and i-propyl benzene (Axelsson et al., 1995). The compounds directly measured by DOAS, with measurement uncertainties include: toluene ( $\pm 15\%$ ), benzene ( $\pm 15\%$ ), o-xylene ( $\pm 15\%$ ), m-xylene ( $\pm 15\%$ ), p-xylene ( $\pm 15\%$ ), styrene ( $\pm 15\%$ ), benzaldehyde ( $\pm 15\%$ ). The compounds scaled via canister speciation have estimated uncertainties of ( $\pm 25\%$ ).

#### 1.4 Oxygenated VOC

In addition to the alkanes, alkenes, and aromatic species, a number of alcohols, aldehydes, ketones, esters, ethers, and organic acids were constrained in the model, see Table 1 for the list of species and scaling methodology. Most notably, formaldehyde (HCHO) and glyoxal were measured by DOAS, both with an uncertainty of  $\pm 25\%$ . Based on the scaling methodology employed here, we estimate that the uncertainty for the oxygenated compounds not directly measured is  $\pm 50\%$ .

Note that for the oxygenated compounds not directly measured, aerosol related loss processes - as discussed for glyoxal in Volkamer et al. (2006), for example - are not included.

## 2 Chain length

For the sake of reference, we have provided all the chain length parameters - both  $n(\text{OH})$  and  $\omega$  - for each modeled scenario in Figure 1.

**Table 1.** VOC constraints used for box modeling based on measurements from MCMA-2003. The input for each species is determined by either i) continuous measurement, ii) scaling to a continuous measurement via speciation as determined by co-located canister sampling, or iii) scaled to a continuous measurement via emission factors taken from Harley et al. (1992) and EPA (2004).

| alkanes            |                      | alkenes               |                      | aromatics              |                      | oxygenates (ctd)            |                      |
|--------------------|----------------------|-----------------------|----------------------|------------------------|----------------------|-----------------------------|----------------------|
| species            | SF x10 <sup>-2</sup> | species               | SF x10 <sup>-2</sup> | species                | SF x10 <sup>-2</sup> | species                     | SF x10 <sup>-2</sup> |
| methane            | FTIR                 | ethene                | 80 <sup>C</sup>      | benzene                | DOAS                 | methanol                    | PTRMS                |
| ethane             | 2.18 <sup>A</sup>    | propene               | 44 <sup>C</sup>      | toluene                | DOAS                 | ethanol                     | 15 <sup>H</sup>      |
| propane            | 42.6 <sup>A</sup>    | 2-methylpropene       | 31 <sup>C</sup>      | m-xylene               | DOAS                 | 1-propanol,2-propanol       | 5                    |
| i-butane           | 7.40 <sup>A</sup>    | c-2-butene            | 4.5 <sup>C</sup>     | p-xylene               | DOAS                 | 1-butanol,2-butanol         | 2 <sup>H</sup>       |
| n-butane           | 19.7 <sup>A</sup>    | t-2-butene            | 5.0 <sup>C</sup>     | styrene                | DOAS                 | 2-methyl-1(2)-propanol      | 2 <sup>H</sup>       |
| i-pentane          | 8.37 <sup>A</sup>    | 1-pentene             | 5.9 <sup>C</sup>     | benzaldehyde           | DOAS                 | ethylene glycol             | 25 <sup>H</sup>      |
| n-pentane          | 3.69 <sup>A</sup>    | c-2-pentene           | 2.8 <sup>C</sup>     | ethyl benzene          | 62 <sup>F</sup>      | propylene glycol            | 10 <sup>H</sup>      |
| n-hexane           | 1.98 <sup>A</sup>    | t-2-pentene           | 5.0 <sup>C</sup>     | n-propyl benzene       | 16 <sup>F</sup>      | 2-methoxy ethanol           | 2 <sup>H</sup>       |
| 2-methylpentane    | 2.77 <sup>A</sup>    | 2-methyl-1-butene     | 12 <sup>C</sup>      | i-propyl benzene       | 22 <sup>F</sup>      | 2-ethoxy ethanol            | 2 <sup>H</sup>       |
| 3-methylpentane    | 1.95 <sup>A</sup>    | 2-methyl-2-butene     | 8.5 <sup>C</sup>     | o-xylene               | 53 <sup>E</sup>      | 1-methoxy 2-propanol        | 2 <sup>H</sup>       |
| 2,2-dimethylbutane | 0.97 <sup>A</sup>    | 1,3-butadiene         | 4.8 <sup>C</sup>     | 1,2,4-trimethylbenzene | 55 <sup>E</sup>      | 2-butoxy ethanol            | 2 <sup>H</sup>       |
| 2,3-dimethylbutane | 0.64 <sup>A</sup>    | isoprene              | 3.9 <sup>C</sup>     | 1,3,5-trimethylbenzene | 19 <sup>E</sup>      | 1-butoxy 2-propanol         | 2 <sup>H</sup>       |
| n-heptane          | 0.64 <sup>A</sup>    | 1-butene              | 15 <sup>D</sup>      | 1,2,3-trimethylbenzene | 14 <sup>E</sup>      | acetone                     | PTRMS                |
| 2-methylhexane     | 0.80 <sup>A</sup>    | 3-methyl-1-butene     | 5.9 <sup>D</sup>     | o-ethyl toluene        | 14 <sup>E</sup>      | methyl ethyl ketone         | PTRMS                |
| 3-methylhexane     | 1.10 <sup>A</sup>    | 1-hexene              | 2.1 <sup>D</sup>     | p-ethyl toluene        | 30 <sup>E</sup>      | acetic acid                 | PTRMS                |
| n-octane           | 0.26 <sup>A</sup>    | c-2-hexene            | 2.1 <sup>D</sup>     | m-ethyl toluene        | 14 <sup>E</sup>      | methyl i-butyl ketone       | 13 <sup>I</sup>      |
| n-nonane           | 0.22 <sup>A</sup>    | t-2-hexene            | 3.8 <sup>D</sup>     | <b>oxygenates</b>      |                      | ethyl acetate               | 0.6 <sup>E</sup>     |
| n-decane           | 0.27 <sup>A</sup>    | 2,3-dimethyl-2-butene | 2.1 <sup>D</sup>     | formaldehyde (HCHO)    | DOAS                 | n-propyl + i-propyl acetate | 0.15 <sup>E</sup>    |
| cyclohexane        | 0.31 <sup>A</sup>    | acetylene             | 1.9 <sup>E</sup>     | acetaldehyde           | PTRMS                | n-butyl acetate             | 0.21 <sup>E</sup>    |
| n-undecane         | 1.6 <sup>B</sup>     |                       |                      | propanal               | 4.5 <sup>G</sup>     | methyl t-butyl ether        | 1.1 <sup>E</sup>     |
| n-dodecane         | 0.32 <sup>B</sup>    |                       |                      |                        |                      |                             |                      |

A-scaled to FTIR(C-H) based on canister speciation

C-continuous FOS signal scaled based on canister speciation

E-scaled to DOAS-benzene based on canister speciation

G-scaled to DOAS-HCHO based on emissions factors

I-scaled to PTRMS-MEK based on emission factors

B-scaled to FTIR(C-H) based on emission factors

D-scaled to FOS signal based on emissions factors

F-scaled to mono-substituted benzene DOAS profile based on canister speciation

H-scaled to PTRMS-CH<sub>3</sub>OH based on emission factors

### 3 OH production and loss: Measurement imbalance

The hydroxyl radical is a short-lived species in the atmosphere, and is in steady-state on a time scale of 0.1 s. Shirley et al. (2006) note the balance observed in median OH production, P(OH), and OH loss, L(OH). The only notable exception is between 07:00-08:00 when OH production

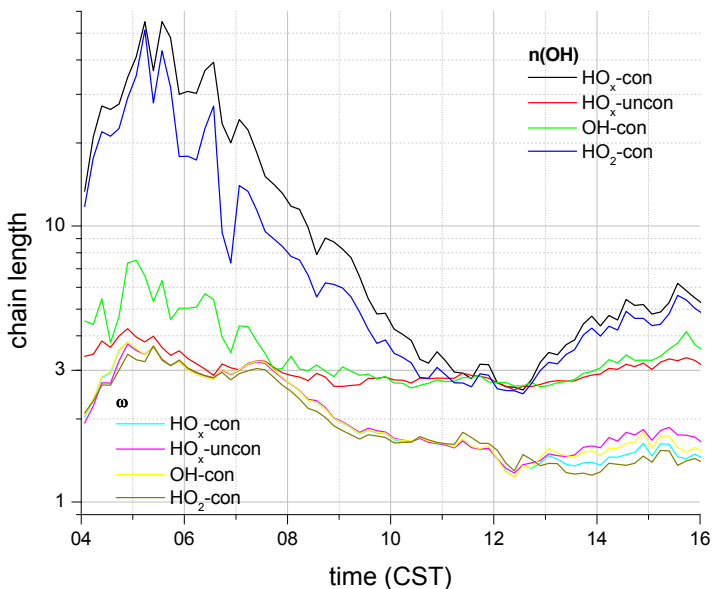

**Fig. 1.** Both chain length parameters are shown for each scenario (see Section 2). Note the differences in the  $n(\text{OH})$  values for each scenario compared to the consistent overlap for the  $\omega$  values throughout the day.

is twice OH loss.  $P(\text{OH})$  and  $L(\text{OH})$  are defined here as:

$$P(\text{OH}) = k_{\text{HO}_2+\text{NO}}[\text{HO}_2][\text{NO}] + \text{OH}_{\text{new}}, \text{ and} \quad (1)$$

$$L(\text{OH}) = k_{\text{OH}+\text{NO}_x}[\text{OH}][\text{NO}_x] + k_{\text{OH}+\text{VOC}}[\text{OH}][\text{VOC}]. \quad (2)$$

The production of OH via reaction between HO<sub>2</sub> and NO accounts on average for more than 80% of P(OH). OH<sub>new</sub> is equivalent to initiation i.e., the generation of a OH radical from the breakdown of a closed shell species e.g., O<sub>3</sub>, and is discussed in more detail elsewhere (Volkm<sup>5</sup>er et al., 2010). The extensive suite of data, including HO<sub>x</sub> and OH loss measurements, provides the means to calculate both OH production and loss throughout the campaign, as shown in Figure 2-A. The difference between median P(OH) and L(OH), L(OH)<sub>med</sub>−P(OH)<sub>med</sub>, is shown with a 2σ *experimental* uncertainty, which is duplicated from the work by Shirley et al. (2006). We have also included the median difference between individual measurements, (L(OH)<sub>ind</sub>−P(OH)<sub>ind</sub>)<sub>med</sub>, and plotted it with 1σ standard deviation i.e., the statistical scatter of the difference between production and loss on an individual basis. Even though the L−P difference plots are similar, the blue error bars emphasize the considerable scatter of individual measurements, and reflect what we consider an imbalance in the measurements. In other words, the “balance” between median production and median loss observed by Shirley et al. (2006) is a function of averaging large statistical scatter, rather than a balanced set of measurements bound by experimental certainty.

To illustrate this more clearly, the difference between OH production and loss from individual measurements as a function of NO is shown in Figure 2-B. The difference is shown as the absolute value of [P(OH)−L(OH)]/P(OH), and values are further separated by 1) P(OH) > L(OH), and 2) P(OH) < L(OH). The 2σ experimental uncertainty is taken as 55% (Shirley et al., 2006), and represented as a dotted line in the figure. Any point *below* this line represents a balance between production and loss within experimental uncertainty, whereas any point *above* the line represents an imbalance in the measurements. By this estimate, 55% of the individual measurements fall outside of the experimental uncertainty – rather than the expected 33% based on a 2σ confidence level – 75% of which are at values of NO lower than 10 ppb (i.e., when confidence in the measurements is highest).

We are not challenging the accuracy of the HO<sub>x</sub> concentration or OH loss measurements, which are of the highest quality attainable to date. The noted imbalance is also independent of the HO<sub>x</sub> calibration. The lack of agreement between OH production and OH loss has drastic implications for any box model. Our MCM box model is simply unable to predict the observed

HO<sub>2</sub> concentrations because of high concentrations of NO<sub>x</sub> in the same air mass. Notably, we use measurements taken at *similar* heights. Although unlikely, the imbalance in the measurements may be the result of micro-meteorological phenomena, with particular emphasis on NO<sub>x</sub>, which directly challenges the assumption that the air mass is homogeneously mixed. For the modeling of chain length, however, the imbalance does not present a fundamental limitation because our two chain length parameters are either only based on the production term (n(OH)), or on the branching ratio of radical loss versus propagation ( $\omega$ ). Neither chain length parameter convolutes radical initiation and termination processes.

#### 4 Individual day modeling

The modeling results are quantified in terms of radical initiation, propagation, and termination routes for individual days for the i) HO<sub>x</sub>-unconstrained (left) and ii) HO<sub>x</sub>-constrained cases (right) in Table 2 - other parameters are also included, and are discussed in greater detail below. Note that the meteorology classification listed in the last row of each of the tables is taken from de Foy et al. (2005). In the event that the continuous collection of data was interrupted, the data gaps were filled by either a) extrapolating based on the median concentration profiles, or b) linearly correlated based on the final measurement before and the first measurement following the gap. Note the variability in radical initiation and cycling on different days. For instance, we report total RO<sub>x</sub> radical initiation as low as  $219 \times 10^5 \text{ molec. cm}^{-3} \text{ s}^{-1}$  on 18/03 and as high as  $808 \times 10^5 \text{ molec. cm}^{-3} \text{ s}^{-1}$  on 15/03. Similarly, we observe the lowest rates of recycling on 18/03; however, we observe the highest rates of recycling on 23/03 because of comparable initiation coupled with higher NO concentrations as compared to 15/03.

#### 5 VOC<sub>R</sub> and NO<sub>x</sub>

We use an ozone isopleth-type graph in Figure 3 to illustrate the relationship between P(O<sub>3</sub>) and VOC<sub>R</sub> and NO<sub>x</sub> - these plots are similar to those shown in Kleinman et al. (2005). We observe very high values for both VOC<sub>R</sub> and NO<sub>x</sub> in Mexico City; much higher than in all US

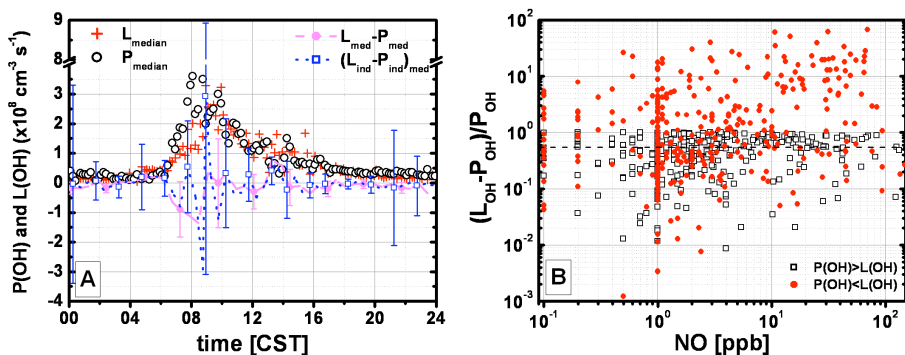

**Fig. 2.** A) Median OH production (open black circles) and loss (red pluses) are plotted against the difference between them with a  $2\sigma$  experimental uncertainty, as replicated from Shirley et al. (2006) (closed magenta circles, dashed line). The median difference between individual experimentally determined P(OH) and L(OH) terms is shown (blue open square, dotted line) with a  $2\sigma$  standard deviation. (Note the break in the y-scale between  $4-7 \times 10^8 \text{ cm}^{-3} \text{ s}^{-1}$ ; the error bars extend equally as far in the negative direction but are not shown). B) The difference in OH production and loss is shown in relative terms by dividing by production (and when values are negative, the absolute value was used). The values are separated by  $P(\text{OH}) > L(\text{OH})$  (black squares) and  $P(\text{OH}) < L(\text{OH})$  (red circles). In principle, the difference should be 0. The dotted line represents an inferred experimental uncertainty, meaning that all points *above* this line fall outside a  $2\sigma$  experimental uncertainty and represent an imbalance in the measurements.

urban airmasses e.g., Houston, Nashville, New York, and Phoenix Kleinman et al. (2005). We observe a near-constant upward sloping relationship between  $\text{VOC}_R$  and  $\text{NO}_x$ , indicating the collocation of VOC and  $\text{NO}_x$  sources.

The differences in measured and predicted  $\text{HO}_x$  radical concentrations yield different  $P(\text{O}_3)$  values, as shown in Figure 3-A and B. In panel B, there is a two-fold increase in the number of points with a predicted  $P(\text{O}_3) > 40 \text{ ppb hr}^{-1}$  as compared to the  $\text{HO}_x$ -unconstrained case.

Theory predicts that  $P(\text{O}_3)$  will reach a maximum at low  $\text{NO}_x$  concentrations and decreases



**Table 2.** Average reaction rates for RO<sub>x</sub> radical pathways on individual days (in March) during MCMA-2003 from 07:00-13:00, as determined by a HO<sub>x</sub>-unconstrained (left) and HO<sub>x</sub>-constrained (right) model in units of 10<sup>5</sup> molec. cm<sup>-3</sup> s<sup>-1</sup>. Averaged values for measured HO<sub>x</sub> concentrations (OH / HO<sub>2</sub>), chain length (n(OH)), ozone production (P(O<sub>3</sub>)), first order reactivity of OH and VOC (VOC-reac.), NO, J(NO<sub>2</sub>), and daily maxima of O<sub>3</sub>, boundary layer height, CO are also shown to aid in the comparison of daily variations.

|     | 9                                                        |            | 10   |            | 11   |             | 12    |             | 13   |             | 14   |             | 15   |             | 16   |             | 17   |             |      |
|-----|----------------------------------------------------------|------------|------|------------|------|-------------|-------|-------------|------|-------------|------|-------------|------|-------------|------|-------------|------|-------------|------|
| I1  | OH initiation                                            | 139        | 140  | 284        | 284  | 232         | 233   | 193         | 193  | 252         | 253  | 147         | 147  | 323         | 324  | 244         | 243  | 265         | 266  |
| T1  | OH termination                                           | 232        | 216  | 370        | 371  | 273         | 385   | 211         | 241  | 247         | 219  | 198         | 206  | 365         | 286  | 330         | 376  | 354         | 317  |
| I2  | RO <sub>2</sub> initiation                               | 82         | 80   | 171        | 172  | 120         | 178   | 108         | 129  | 144         | 142  | 89          | 93   | 166         | 150  | 152         | 167  | 153         | 147  |
| T2  | RO <sub>2</sub> termination                              | 60         | 55   | 269        | 268  | 190         | 258   | 186         | 222  | 250         | 216  | 133         | 150  | 293         | 217  | 220         | 251  | 216         | 200  |
| I3  | RO initiation                                            | 6          | 4    | 8          | 8    | 13          | 15    | 5           | 6    | 8           | 7    | 4           | 4    | 9           | 8    | 9           | 10   | 9           | 8    |
| T3  | RO termination                                           | 20         | 18   | 33         | 33   | 22          | 34    | 20          | 26   | 24          | 24   | 18          | 18   | 37          | 32   | 33          | 38   | 31          | 29   |
| I4  | HO <sub>2</sub> initiation                               | 102        | 100  | 262        | 263  | 181         | 289   | 150         | 173  | 195         | 193  | 134         | 137  | 260         | 242  | 234         | 249  | 228         | 221  |
| T4  | HO <sub>2</sub> termination                              | 1          | 1    | 13         | 11   | 11          | 14    | 17          | 23   | 26          | 25   | 7           | 13   | 15          | 12   | 16          | 19   | 12          | 15   |
| P1  | OH→RO <sub>2</sub>                                       | 843        | 686  | 1445       | 1445 | 1345        | 1770  | 855         | 981  | 1284        | 1133 | 735         | 776  | 1503        | 1157 | 1265        | 1461 | 1308        | 1160 |
| P2  | RO <sub>2</sub> →RO                                      | 755        | 620  | 1148       | 1152 | 1216        | 1585  | 690         | 788  | 1073        | 972  | 588         | 606  | 1170        | 938  | 1034        | 1191 | 1126        | 995  |
|     | via NO                                                   | 505        | 432  | 840        | 835  | 855         | 1081  | 517         | 571  | 802         | 703  | 428         | 426  | 855         | 661  | 754         | 847  | 812         | 698  |
|     | via RO <sub>2</sub>                                      | 236        | 176  | 293        | 294  | 376         | 475   | 173         | 202  | 271         | 250  | 160         | 169  | 315         | 259  | 280         | 321  | 313         | 285  |
| P-2 | RO→RO <sub>2</sub>                                       | 139        | 102  | 200        | 200  | 267         | 332   | 122         | 142  | 185         | 167  | 101         | 107  | 220         | 175  | 196         | 225  | 206         | 186  |
| P3  | RO→HO <sub>2</sub>                                       | 574        | 476  | 877        | 880  | 903         | 1190  | 525         | 600  | 817         | 741  | 450         | 463  | 886         | 709  | 777         | 896  | 854         | 756  |
| P4  | HO <sub>2</sub> →OH                                      | 1047       | 2628 | 1750       | 2844 | 1553        | 5424  | 993         | 1735 | 1460        | 2322 | 893         | 1740 | 1796        | 2318 | 3691        | 3491 | 1587        | 2889 |
| P5  | OH→HO <sub>2</sub>                                       | 105        | 78   | 205        | 204  | 156         | 231   | 113         | 132  | 171         | 149  | 101         | 112  | 237         | 183  | 179         | 204  | 180         | 166  |
|     | chain length                                             | 2.8        | 9.2  | 2.6        | 5.0  | 3.0         | 8.8   | 2.5         | 4.2  | 2.8         | 4.2  | 2.6         | 4.9  | 2.6         | 3.9  | 2.6         | 5.9  | 2.6         | 4.5  |
|     | P(O <sub>3</sub> ) (ppb/hr)                              | 27.2       | 54.0 | 42.3       | 62.5 | 40.0        | 115.1 | 24.1        | 38.5 | 37.3        | 52.2 | 21.2        | 36.8 | 42.7        | 50.5 | 37.3        | 78.8 | 39.0        | 61.9 |
|     | OH / HO <sub>2</sub> (ppt)                               | 0.08 / 3.0 |      | 0.20 / 8.7 |      | 0.20 / 11.5 |       | 0.23 / 14.0 |      | 0.23 / 15.7 |      | 0.21 / 11.7 |      | 0.20 / 11.5 |      | 0.22 / 13.9 |      | 0.21 / 12.4 |      |
|     | O <sub>3</sub> max (ppb)                                 | 130        |      | 146        |      | 78          |       | 150         |      | 109         |      | 144         |      | 156         |      | 156         |      | 115         |      |
|     | VOC-reactivity (s <sup>-1</sup> )                        | 49         |      | 50         |      | 67          |       | 37          |      | 43          |      | 28          |      | 35          |      | 52          |      | 42          |      |
|     | NO (ppb)                                                 | 37         |      | 36         |      | 54          |       | 15          |      | 16          |      | 17          |      | 17          |      | 37          |      | 26          |      |
|     | J(NO <sub>2</sub> ) (x10 <sup>-3</sup> s <sup>-1</sup> ) | 2.7        |      | 5.5        |      | 5.4         |       | 6.7         |      | 6.5         |      | 5.8         |      | 6.1         |      | 6.0         |      | 6.3         |      |
|     | PBL (km)                                                 | 1.9        |      | 1.9        |      | 2.3         |       | -           |      | 3.3         |      | 2.9         |      | 3.5         |      | 3.5         |      | 3.3         |      |
|     | COmax (ppm)                                              | 4.2        |      | 5.2        |      | 8.5         |       | 4.2         |      | 4.0         |      | 2.8         |      | 2.5         |      | 4.7         |      | 3.4         |      |
|     | meteorology                                              | cold surge |      | cold surge |      | cold surge  |       | O3-North    |      | O3-North    |      | O3-South    |      | O3-South    |      | O3-South    |      | O3-South    |      |

at higher NO<sub>x</sub> concentrations: We observe this in the HO<sub>x</sub>-unconstrained case, however, we do not observe this to be true in the HO<sub>x</sub>-constrained case. The VOC loadings in Mexico City are sufficiently high at high NO<sub>x</sub> concentrations as to perpetuate radical cycling, rather than allowing the termination pathways via NO<sub>x</sub> reactions to dominate. The measured HO<sub>x</sub> concentrations at concurrently high VOC and NO<sub>x</sub> loadings characterize a previously unidentified scenario for ozone production rates.

Kleinman et al. (2005) also employ a novel parameter L<sub>N</sub>/Q to understand the VOC and

|                                                          |                             | 18          |     | 19          |      | 20          |      | 21          |      | 22          |      | 23          |      | 24          |      | 25          |      | 26          |      |
|----------------------------------------------------------|-----------------------------|-------------|-----|-------------|------|-------------|------|-------------|------|-------------|------|-------------|------|-------------|------|-------------|------|-------------|------|
| I1                                                       | OH initiation               | 84          | 84  | 211         | 212  | 222         | 223  | 262         | 263  | 252         | 254  | 278         | 278  | 205         | 206  | 211         | 212  | 183         | 183  |
| T1                                                       | OH termination              | 79          | 52  | 226         | 200  | 216         | 191  | 253         | 243  | 221         | 143  | 298         | 250  | 161         | 139  | 278         | 286  | 233         | 216  |
| I2                                                       | RO <sub>2</sub> initiation  | 54          | 48  | 149         | 146  | 144         | 142  | 156         | 155  | 159         | 132  | 210         | 199  | 98          | 99   | 145         | 155  | 153         | 156  |
| T2                                                       | RO <sub>2</sub> termination | 79          | 62  | 238         | 203  | 240         | 195  | 272         | 236  | 302         | 182  | 343         | 272  | 187         | 131  | 221         | 203  | 227         | 196  |
| I3                                                       | RO initiation               | 2           | 1   | 6           | 5    | 7           | 6    | 7           | 6    | 7           | 4    | 9           | 7    | 4           | 3    | 7           | 7    | 7           | 6    |
| T3                                                       | RO termination              | 10          | 7   | 25          | 23   | 23          | 22   | 29          | 29   | 27          | 20   | 40          | 37   | 19          | 18   | 30          | 33   | 29          | 30   |
| I4                                                       | HO <sub>2</sub> initiation  | 81          | 73  | 215         | 211  | 213         | 210  | 237         | 235  | 231         | 200  | 319         | 306  | 156         | 153  | 242         | 252  | 245         | 248  |
| T4                                                       | HO <sub>2</sub> termination | 29          | 28  | 36          | 35   | 48          | 33   | 52          | 35   | 46          | 20   | 68          | 41   | 51          | 31   | 31          | 29   | 51          | 39   |
| P1                                                       | OH→RO <sub>2</sub>          | 522         | 336 | 1255        | 1101 | 1231        | 1062 | 1272        | 1168 | 1337        | 840  | 1575        | 1310 | 844         | 661  | 1164        | 1160 | 1066        | 972  |
| P2                                                       | RO <sub>2</sub> →RO         | 419         | 276 | 1027        | 928  | 1011        | 913  | 1009        | 959  | 1061        | 717  | 1256        | 1096 | 669         | 573  | 963         | 999  | 881         | 840  |
|                                                          | via NO                      | 273         | 175 | 744         | 648  | 727         | 634  | 744         | 685  | 766         | 495  | 923         | 778  | 475         | 394  | 710         | 717  | 642         | 592  |
|                                                          | via RO <sub>2</sub>         | 146         | 96  | 283         | 262  | 284         | 262  | 265         | 255  | 295         | 209  | 333         | 297  | 194         | 168  | 253         | 263  | 239         | 232  |
| P-2                                                      | RO→RO <sub>2</sub>          | 72          | 49  | 168         | 150  | 178         | 159  | 175         | 165  | 181         | 120  | 223         | 191  | 122         | 100  | 172         | 173  | 164         | 152  |
| P3                                                       | RO→HO <sub>2</sub>          | 330         | 215 | 791         | 715  | 771         | 698  | 771         | 733  | 815         | 550  | 962         | 840  | 511         | 439  | 730         | 759  | 666         | 637  |
| P4                                                       | HO <sub>2</sub> →OH         | 620         | 791 | 1476        | 1940 | 1434        | 1954 | 1490        | 2257 | 1517        | 1177 | 1864        | 2979 | 970         | 1768 | 1426        | 3719 | 1303        | 2638 |
| P5                                                       | OH→HO <sub>2</sub>          | 96          | 62  | 195         | 170  | 198         | 167  | 215         | 193  | 199         | 126  | 255         | 208  | 161         | 112  | 185         | 173  | 177         | 154  |
| chain length                                             |                             | 3.1         | 4.3 | 3.0         | 4.4  | 2.8         | 4.1  | 2.7         | 5.4  | 2.9         | 3.0  | 2.8         | 5.4  | 2.5         | 5.2  | 2.7         | 6.9  | 2.6         | 5.7  |
| P(O <sub>3</sub> ) (ppb/hr)                              |                             | 15          | 17  | 37          | 45   | 36          | 45   | 37          | 51   | 38          | 29   | 47          | 66   | 24          | 38   | 35          | 78   | 32          | 57   |
| OH/HO <sub>2</sub> (ppt)                                 |                             | 0.22 / 20.1 |     | 0.24 / 18.2 |      | 0.23 / 18.4 |      | 0.22 / 15.6 |      | 0.16 / 12.0 |      | 0.20 / 16.1 |      | 0.21 / 16.8 |      | 0.20 / 18.8 |      | 0.18 / 19.0 |      |
| O <sub>3</sub> max (ppb)                                 |                             | 77          |     | 135         |      | 117         |      | 136         |      | 147         |      | 58          |      | 132         |      | 122         |      | 121         |      |
| VOC-reactivity (s <sup>-1</sup> )                        |                             | 13          |     | 35          |      | 32          |      | 36          |      | 35          |      | 49          |      | 29          |      | 45          |      | 38          |      |
| NO (ppb)                                                 |                             | 4           |     | 13          |      | 12          |      | 20          |      | 13          |      | 28          |      | 20          |      | 28          |      | 16          |      |
| J(NO <sub>2</sub> ) (x10 <sup>-3</sup> s <sup>-1</sup> ) |                             | 6.2         |     | 6.0         |      | 6.2         |      | 5.8         |      | 5.8         |      | 6.8         |      | 6.8         |      | 6.8         |      | 6.8         |      |
| PBL (km)                                                 |                             | 3.1         |     | 1.5         |      | 2.5         |      | 2.9         |      | 1.5         |      | -           |      | 3.5         |      | 3.5         |      | 3.0         |      |
| COmax (ppm)                                              |                             | 1.6         |     | 2.8         |      | 2.4         |      | 3.9         |      | 1.9         |      | 4.6         |      | 3.8         |      | 5.8         |      | 4.3         |      |
| meteorology                                              |                             | O3-North    |     | cold surge  |      | cold surge  |      | cold surge  |      | cold surge  |      | O3-North    |      | O3-North    |      | O3-North    |      | O3-North    |      |

NO<sub>x</sub> limitations of ozone production, where L<sub>N</sub> is the sum of RO<sub>x</sub> radical loss rates due to reaction with NO<sub>x</sub> and Q is the summation of new radical production. While our explicit model is ideally suited to predict this parameter, and compare to values presented by Kleinman et al. (2005), the HO<sub>x</sub>-constrained code presents a problem because it is unbalanced with regard to radical production and destruction. This imbalance results in higher than expected values for L<sub>N</sub>, resulting in values for the L<sub>N</sub>/Q parameter well above 1. These values do not make physical sense, and as such, we are unable to use the L<sub>N</sub>/Q parameter in the same manner as Kleinman et al. (2005) to draw conclusions about the VOC and/or NO<sub>x</sub> sensitivity of the MCMA.

Our near-explicit code does, however, provide the means to test some of the basic assumptions employed to derive the L<sub>N</sub>/Q parameter to the MCMA. The approximation of L<sub>N</sub> being equivalent to the flux from the reaction of OH with NO<sub>2</sub> i.e., that the formation of organic nitrates via reaction of RO<sub>2</sub> with NO is negligible, under-estimates L<sub>N</sub> by some 15-30% throughout the day. In determining the relationship between L<sub>N</sub>/Q relative to VOC reactivity and NO<sub>x</sub> reactivity, Kleinman et al. (2001) also make the following assumption. In the limit that chain

propagation is much more important than chain initiation and termination:

$$k_{\text{OH}+\text{VOC}}[\text{OH}][[\text{VOC}]] = k_{\text{HO}_2+\text{NO}}[\text{HO}_2][[\text{NO}]] \quad (3)$$

Even though the VOC loadings are high and radical cycling is fast in the MCMA, this assumption breaks down in the high  $\text{NO}_x$  environment in the MCMA. Based on our model, by not accounting for other radical pathways i.e.,  $\text{OH} \rightarrow \text{HO}_2$  (P5 in Figure 1) or OH termination (T1 in Figure 1) in their approximation, Kleinman et al. (2001) introduce an uncertainty of about 20%. In the  $\text{HO}_x$ -constrained model, the measured concentrations of  $\text{HO}_2$  are higher than in the unconstrained case, and the radical flux of  $\text{HO}_2 \rightarrow \text{OH}$  is subsequently much higher than OH loss via reaction with VOC. As such, the assumption by Kleinman et al. (2001) introduces a minimum uncertainty of 20%, and a maximum of a factor of 5 (i.e., 500%) in the  $\text{HO}_x$ -constrained case. Combining the uncertainty in the determination of  $L_N$  and the imbalance in the assumption relative to OH production and loss, we estimate a lower-limit of uncertainty in the  $L_N/Q$  parameter of some 30%. Furthermore, this does not account for any uncertainty in the Q parameter; depending on the time of day,  $\text{O}_3$  and HCHO photolysis and  $\text{O}_3$ /alkene reactions account for 29-65% of the value of Q (Volkamer et al., 2010). The traditional definition of Q accounts for  $\text{O}_3$  and HCHO photoysis; based on results from Volkamer et al. (2010) these in sum account for less than half of the radical initiation in the MCMA. We also note that the quantitative use of the  $L_N/Q$  parameter requires accounting for an expanded radical initiation scheme that also accounts for the other radical sources. Despite these limitations, an expanded  $L_N/Q$  concept can conceivably applied to the MCMA.

In the lower panel of Figure 3, the shapes on the graph indicate the  $\text{VOC}_R$  and  $\text{NO}_x$  ‘coordinates’ of  $P(\text{O}_3)$  values reported in a 5-city study by Kleinman et al. (2005), with the range of  $P(\text{O}_3)$  generally between 20-60  $\text{ppb hr}^{-1}$ . The higher ozone production rates reported for the MCMA are consistent with the higher VOC loadings and the high  $\text{NO}_x$  environment. Even though  $\text{NO}_x$  levels in the MCMA are up to an order of magnitude higher than other urban areas, the ozone production levels do not scale linearly because of the increased radical flux along loss routes for OH and  $\text{RO}_2$  with  $\text{NO}_2$  and NO, respectively. It is also worth noting that we consider our values for  $P(\text{O}_3)$  as an under-estimate based on lower-than-expected  $\text{RO}_2$  values. In other

urban studies, as indicated by the dark and light gray shaded lines in Figure 5-B they note a RO<sub>2</sub>-to-HO<sub>2</sub> ratio of roughly 1, whereas a HO<sub>x</sub>-constrained calculation here indicates a much lower value ( 0.2); a RO<sub>2</sub>-to-HO<sub>2</sub> value of 0.8, for instance, may result in ozone production levels about 40-50 ppb hr<sup>-1</sup> higher.

## 5 References

Axelsson, H., Eilard, a., Emanuelsson, a., Galle, B., Edner, H., Ragnarson, P., and Kloo, H.: Measurement of Aromatic-Hydrocarbons with the Doas Technique, *Applied Spectroscopy*, 49, 1254–1260, 1995.

de Foy, B., Caetano, E., Magana, V., Zitacuaro, A., Cardenas, B., Retama, A., Molina, L., and Molina, M.: Mexico City basin wind circulation during the MCMA-2003 field campaign, *Atmospheric Chemistry and Physics*, 5, 2267–2288, 2005.

EPA: Hazardous Air Pollutants: EPA AirData Monitor Values Report, Tech. rep., US Environmental Protection Agency, <http://www.epa.gov/air/data>, 2004.

Harley, R. A., Hannigan, M. P., and Cass, G. R.: Respeciation of Organic Gas Emissions and the Detection of Excess Unburned Gasoline in the Atmosphere, *Environmental Science and Technology*, 26, 2395–2408, 1992.

Kleinman, L. I., Daum, P. H., Lee, Y. N., Nunnermacker, L. J., Springston, S. R., Weinstein-Lloyd, J., and Rudolph, J.: Sensitivity of ozone production rate to ozone precursors, *Geophysical Research Letters*, 28, 2903–2906, 2001.

Kleinman, L. I., Daum, P. H., Lee, Y. N., Nunnermacker, L. J., Springston, S. R., Weinstein-Lloyd, J., and Rudolph, J.: A comparative study of ozone production in five U.S. metropolitan areas, *Journal of Geophysical Research-Atmospheres*, 110, D02 301, 2005.

Shirley, T. R., Brune, W. H., Ren, X., Mao, J., Leshner, R., Cardenas, B., Volkamer, R., Molina, L. T., Molina, M. J., Lamb, B., Velasco, E., Jobson, T., and Alexander, M.: Atmospheric oxidation in the Mexico City Metropolitan Area (MCMA) during April 2003, *Atmospheric Chemistry and Physics*, 6, 2753–2765, 2006.

Velasco, E., Lamb, B., Westberg, H., Allwine, E., Sosa, G., Arriaga-Colina, J. L., Jobson, B. T., Alexander, M., Prazeller, P., Knighton, W. B., Rogers, T. M., Grutter, M., Herndon, S. C., Kolb, C. E., Zavala, M., de Foy, B., Volkamer, R., Molina, L. T., and Molina, M. J.: Distribution, magnitudes, reactivities,

- ratios and diurnal patterns of volatile organic compounds in the Valley of Mexico during the MCMA 2002 & 2003 field campaigns, *Atmospheric Chemistry And Physics*, 7, 329–353, 2007.
- 5 Volkamer, R., Etzkorn, T., Geyer, A., and Platt, U.: Correction of the oxygen interference with UV spectroscopic (DOAS) measurements of monocyclic aromatic hydrocarbons in the atmosphere, *Atmospheric Environment*, 32, 3731–3747, 1998.
- Volkamer, R., Molina, L. T., Molina, M. J., Flores, E., Grutter, M., Galle, B., Mellqvist, J., Samuelsson, J., Knighton, B., and Jobson, B. T.: Open-path Emission Factors Derived from DOAS and FTIR Measurements in the Mexico City Metropolitan Area, *American Geophysical Union, Fall Meeting Supplement*, 85, Abstract A11A–0003, 2004.
- 10 Volkamer, R., Molina, L., Molina, M., Shirley, T., and Brune, W. H.: DOAS measurement of glyoxal as an indicator for fast VOC chemistry in urban air, *Geophysical Research Letters*, 32, L08 806, 2005.
- Volkamer, R., Jimenez, J. L., San Martini, F., Dzepina, K., Zhang, Q., Salcedo, D., Molina, L. T., Worsnop, D. R., and Molina, M. J.: Secondary organic aerosol formation from anthropogenic air pollution: Rapid and higher than expected, *Geophysical Research Letters*, 33, 4, 2006.
- 15 Volkamer, R., Sheehy, P., Molina, L., and Molina, M.: Oxidative capacity of the Mexico City atmosphere - Part 1: A radical source perspective, *Atmospheric Chemistry and Physics*, 2010.

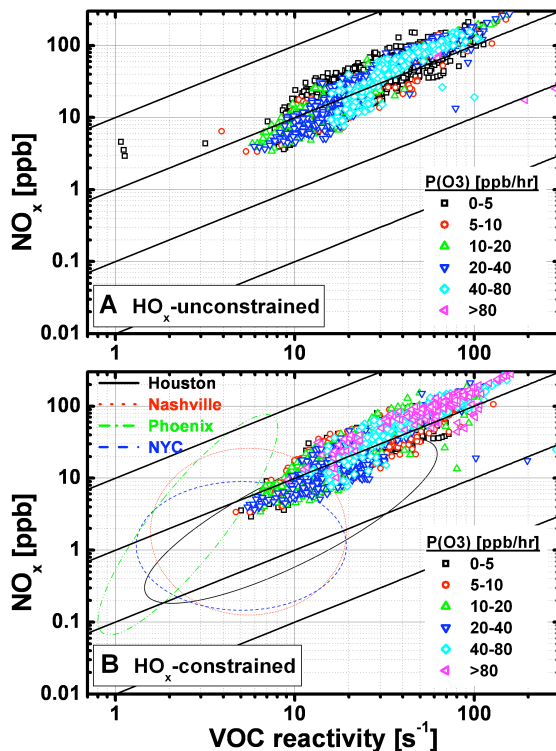

**Fig. 3.** Ozone production rates shown are shown as a function of  $\text{VOC}_R$  and  $\text{NO}_x$  in the  $\text{HO}_x$ -unconstrained (A) and  $\text{HO}_x$ -constrained cases (B). Note the increased prevalence of higher  $P(\text{O}_3)$  values in panel B ( $80+ \text{ ppb hr}^{-1}$ ), as represented by the magenta left-triangles. Panel B also shows traces of ozone production rates as determined for other cities (Kleinman et al., 2005): Houston (black, solid line), Nashville (red, dotted line), Phoenix (green, dash-dot line), and New York City (blue, dashed line). The diagonal isolines represent constant  $\text{VOC}_R/\text{NO}_x$  ratios.
